# Supplementary material for: Unearthing soil-plant-microbiota crosstalk: Looking back to move forward
Source: Front Plant Sci. 2023 Jan 24;13:1082752. doi: 10.3389/fpls.2022.1082752 (PMC9902496; doi:10.3389/fpls.2022.1082752)
Supplement: Supplementary file 1 [file Table_1.xlsx]

## Sheet: Sheet1
Table S1: list of soil databases released in the period 2007-2022. Database name, date of release, and URL are indicated.
Database name	Date of release	URL
SINFO: ESDB Data adapted for the MARS Crop Yield Forecasting System	2007	https://esdac.jrc.ec.europa.eu/content/sinfo-esdb-data-adapted-mars-crop-yield-forecasting-system
Heavy Metals in topsoils	2008	https://esdac.jrc.ec.europa.eu/content/heavy-metals-topsoils
Soil profile databases	2008	https://data.isric.org/geonetwork/srv/eng/catalog.search#/metadata/a351682c-330a-4995-a5a1-57ad160e621c
Soil Profile Analytical Database 2	2009	https://esdac.jrc.ec.europa.eu/content/soil-profile-analytical-database-2
Natural susceptibility to soil compaction in Europe	2009	https://esdac.jrc.ec.europa.eu/content/natural-susceptibility-soil-compaction-europe
Saline and Sodic Soils in European Union	2009	https://esdac.jrc.ec.europa.eu/content/saline-and-sodic-soils-european-union
SPADE/M	2009	https://esdac.jrc.ec.europa.eu/content/spadem
Soil pH in Europe	2010	https://esdac.jrc.ec.europa.eu/content/soil-ph-europe
European Food Safety Authority (EFSA) Data & PERSAM software tool	2011	https://esdac.jrc.ec.europa.eu/content/european-food-safety-authority-efsa-data-persam-software-tool
G2 soil erosion model data	2011	https://esdac.jrc.ec.europa.eu/themes/g2-model
iSOIL project (Interactions between soil related sciences)	2011	https://esdac.jrc.ec.europa.eu/content/isoil-project-interactions-between-soil-related-sciences
Soil Erodibility (K- Factor) High Resolution dataset for Europe	2011	https://esdac.jrc.ec.europa.eu/content/soil-erodibility-k-factor-high-resolution-dataset-europe
Global Soil Organic Carbon Estimates	2012	https://esdac.jrc.ec.europa.eu/content/global-soil-organic-carbon-estimates
Biochar Meta-analysis Database	2012	https://esdac.jrc.ec.europa.eu/content/biochar-meta-analysis-database
Harmonized World Soil Database v 1.2	2012	https://www.fao.org/soils-portal/data-hub/soil-maps-and-databases/harmonized-world-soil-database-v12/en/
Soil erosion by wind	2013	https://esdac.jrc.ec.europa.eu/content/Soil_erosion_by_wind
LUCAS 2009 TOPSOIL data	2013	https://esdac.jrc.ec.europa.eu/content/lucas-2009-topsoil-data
European Soil Database Derived data	2013	https://esdac.jrc.ec.europa.eu/content/european-soil-database-derived-data
Pan-European SOC stock of agricultural soils	2013	https://esdac.jrc.ec.europa.eu/content/pan-european-soc-stock-agricultural-soils
Soil erosion in forestland in Europe (using RUSLE2015)	2014	https://esdac.jrc.ec.europa.eu/content/soil-erosion-forestland-europe-using-rusle2015
Topsoil Soil Organic Carbon (LUCAS) for EU25	2014	https://esdac.jrc.ec.europa.eu/content/topsoil-soil-organic-carbon-lucas-eu25
Soil Sealing & food security (Loss of Potential Agricultural Production Capability)	2014	https://esdac.jrc.ec.europa.eu/content/soil-sealing-food-security-loss-potential-agricultural-production-capability
LS-factor (Slope Length and Steepness factor) for the EU	2015	https://esdac.jrc.ec.europa.eu/content/ls-factor-slope-length-and-steepness-factor-eu
Support Practices factor (P-factor) for the EU	2015	https://esdac.jrc.ec.europa.eu/content/support-practices-factor-p-factor-eu
Global Landform classification	2015	https://esdac.jrc.ec.europa.eu/content/global-landform-classification
Cover Management factor (C-factor) for the EU	2015	https://esdac.jrc.ec.europa.eu/content/cover-management-factor-c-factor-eu
Topsoil physical properties for Europe (based on LUCAS topsoil data)	2015	https://esdac.jrc.ec.europa.eu/content/topsoil-physical-properties-europe-based-lucas-topsoil-data
Soil erosion by water (RUSLE2015)	2015	https://esdac.jrc.ec.europa.eu/content/soil-erosion-water-rusle2015
Potential threats to soil biodiversity in Europe	2016	https://esdac.jrc.ec.europa.eu/content/potential-threats-soil-biodiversity-europe
Global Soil Biodiversity Atlas Maps	2016	https://esdac.jrc.ec.europa.eu/content/global-soil-biodiversity-atlas
Predicted distribution of SOC content in Europe (based on LUCAS, BioSoil and CZO) in the context of the EU-funded SoilTrEC project.	2016	https://esdac.jrc.ec.europa.eu/content/predicted-distribution-soc-content-europe-based-lucas-biosoil-and-czo-context-eu-funded-1
Soil Organic Carbon - Saturation Capacity in Europe	2016	https://esdac.jrc.ec.europa.eu/content/soil-organic-carbon-saturation-capacity
Maps of indicators of soil hydraulic properties for Europe	2016	https://esdac.jrc.ec.europa.eu/content/maps-indicators-soil-hydraulic-properties-europe
Maps of the Storing and Filtering Capacity of Soils in Europe	2016	https://esdac.jrc.ec.europa.eu/content/maps-storing-and-filtering-capacity-soils-europe
Maps of preservation capacity of cultural artefacts and buried materials in soils in the EU	2016	https://esdac.jrc.ec.europa.eu/content/maps-related-predicting-preservation-cultural-artefacts-and-buried-materials-soils-eu-0
European map of soil suitability to provide a platform for most human activities (EU28)	2016	https://esdac.jrc.ec.europa.eu/content/european-map-soil-suitability-provide-platform-most-human-activities-eu28
Soil Organic Carbon (SOC) Projections for Europe	2016	https://esdac.jrc.ec.europa.eu/content/soil-organic-carbon-soc-projections-europe
Maps indicating the availability of Raw Material from soils in the European Union.	2016	https://esdac.jrc.ec.europa.eu/content/map-indicating-availability-raw-material-soils-european-union-organic-soil-material-b-soil
Soil Biomass Productivity maps of grasslands and pasture, of croplands and of forest areas in the European Union (EU27)	2016	https://esdac.jrc.ec.europa.eu/content/soil-biomass-productivity-maps-grasslands-and-pasture-coplands-and-forest-areas-european
N2O emissions from agricultural soils in Europe	2017	https://esdac.jrc.ec.europa.eu/content/n2o-emissions-agricultural-soils
3D Soil Hydraulic Database of Europe at 1 km and 250 m resolution	2017	https://esdac.jrc.ec.europa.eu/content/3d-soil-hydraulic-database-europe-1-km-and-250-m-resolution
Global Rainfall Erosivity	2017	https://esdac.jrc.ec.europa.eu/content/global-rainfall-erosivity
European Landslide Susceptibility Map version 2 (ELSUS v2)	2018	https://esdac.jrc.ec.europa.eu/content/european-landslide-susceptibility-map-elsus-v2
WRB Data for the Soil Atlas of the Northern Circumpolar Region	2018	https://esdac.jrc.ec.europa.eu/content/soil-atlas-northern-circumpolar-region
Net erosion and sediment transport using WaTEM/SEDEM (for EU)	2018	https://esdac.jrc.ec.europa.eu/content/estimate-net-erosion-and-sediment-transport-using-watemsedem-european-union
Soil GHG fluxes using LUCAS soil-DayCent (for EU)	2018	https://esdac.jrc.ec.europa.eu/content/soil-ghg-fluxes-using-lucas-soil-daycent
Copper distribution in topsoils in the European Union	2018	https://esdac.jrc.ec.europa.eu/content/copper-distribution-topsoils
Soil profile analytical database 14 (SPADE 14)	2018	https://esdac.jrc.ec.europa.eu/content/spade-14
Biodiversity factor in soil erosion.	2018	https://esdac.jrc.ec.europa.eu/content/biodiversity-factor-soil-erosion
Carbon budget in the EU agricultural soils	2018	https://esdac.jrc.ec.europa.eu/content/carbon-budget-eu-agricultural-soils
Maps of heavy metals in the soils of the EU, based on LUCAS 2009 HM data	2018	https://esdac.jrc.ec.europa.eu/content/maps-heavy-metals-soils-eu-based-lucas-2009-hm-data-0
Soil loss due to crop harvesting in the European Union	2019	https://esdac.jrc.ec.europa.eu/content/soil-loss-due-crop-harvesting-european-union
Global Soil Erosion	2019	https://esdac.jrc.ec.europa.eu/content/global-soil-erosion
Maps of Soil Chemical properties at European scale based on LUCAS 2009/2012 topsoil data	2019	https://esdac.jrc.ec.europa.eu/content/chemical-properties-european-scale-based-lucas-topsoil-data
Soil Organic Matter (SOM) fractions	2019	https://esdac.jrc.ec.europa.eu/content/soil-organic-matter-som-fractions
Global Soil Organic carbon Map	2019	https://www.fao.org/soils-portal/data-hub/soil-maps-and-databases/global-soil-organic-carbon-map-gsocmap/en/
Caesium-137 and Plutonium-239+240 in European topsoils	2020	https://esdac.jrc.ec.europa.eu/content/caesium-137-and-plutonium-239240-european-topsoils
Global soil erosion by water in 2070	2020	https://esdac.jrc.ec.europa.eu/content/global-soil-erosion-water-2070
Global phosphorus losses due to soil erosion	2020	https://esdac.jrc.ec.europa.eu/content/global-phosphorus-losses-due-soil-erosion-0
Carbon mitigation potential and radiative agricultural land management	2020	https://esdac.jrc.ec.europa.eu/content/carbon-mitigation-potential-and-radiative-agricultural-land-management
LUCAS 2015 TOPSOIL data	2020	https://esdac.jrc.ec.europa.eu/content/lucas2015-topsoil-data
Mercury content in the European Union topsoil	2021	https://esdac.jrc.ec.europa.eu/content/mercury-content-european-union-topsoil
Land degradation in global arable lands	2021	https://esdac.jrc.ec.europa.eu/content/land-degradation-global-arable-lands
Water erosion in Europe by 2050	2021	https://esdac.jrc.ec.europa.eu/content/water-erosion-europe-2050
Soil microbial biomass and respiration	2021	https://esdac.jrc.ec.europa.eu/content/soil-microbial-biomass-and-respiration
Land degradation debt	2021	https://esdac.jrc.ec.europa.eu/content/land-degradation-debt
Global Applications of Soil Erosion Modelling Tracker	2021	https://esdac.jrc.ec.europa.eu/content/global-applications-soil-erosion-modelling-tracker
Manure and soil biodiversity	2021	https://esdac.jrc.ec.europa.eu/content/manure-and-soil-biodiversity
Global Map of Salt-affected Soils	2021	https://www.fao.org/soils-portal/data-hub/soil-maps-and-databases/global-map-of-salt-affected-soils/en/
High resolution cropland global soil erosion (GloSEM 1.3)	2022	https://esdac.jrc.ec.europa.eu/content/glosem
Phosphorus plant removal	2022	https://esdac.jrc.ec.europa.eu/content/phosphorus-plant-removal
Glucose-induced priming effects in soils across Europe	2022	https://esdac.jrc.ec.europa.eu/content/priming-effects-soils-across-europe
LUCAS 2018 TOPSOIL data	2022	https://esdac.jrc.ec.europa.eu/content/lucas-2018-topsoil-data
Global rainfall erosivity projections for 2050 and 2070	2022	https://esdac.jrc.ec.europa.eu/themes/future-global-rainfall-erosivity-2050-and-2070
Phosphorus budget and P stocks	2022	https://esdac.jrc.ec.europa.eu/content/phosphorus-budget-and-p-stocks
Gully Erosion based on LUCAS	2022	https://esdac.jrc.ec.europa.eu/content/gully-erosion-based-lucas
Soil Biodiversity Conservation literature and legally binding instruments	2022	https://esdac.jrc.ec.europa.eu/content/soil-biodiversity-conservation-literature-and-legally-binding-instruments
Global Soil Sequestration Potential Map	2022	https://www.fao.org/soils-portal/data-hub/soil-maps-and-databases/global-soil-organic-carbon-sequestration-potential-map-gsocseq/en/
